RESEARCH ARTICLE

# Varus-valgus native knee laxity in extension displays an almost rectangular pattern and does not correlate with lower limb alignment

Manabu Akagawa<sup>1\*</sup>, Hidetomo Saito<sup>1</sup>, Yasuhiro Takahashi<sup>2</sup>, Hiroaki Tsukamoto<sup>3</sup>, Kazunobu Abe<sup>2</sup>, Yosuke Iwamoto<sup>2</sup>, Takayuki Yoshikawa<sup>2</sup>, Toshiki Abe<sup>2</sup>, Hiroaki Kijima<sup>1</sup>, Yuji Kasukawa<sup>1</sup>, Koji Nozaka<sup>1</sup>, Naohisa Miyakoshi<sup>1</sup>

**1** Department of Orthopedic Surgery, Akita University Graduate School of Medicine, Hondo, Akita, Japan, **2** Department of Orthopedic Surgery, Omagari Kousei Medical Center, Daisen, Akita, Japan, **3** Department of Orthopedic Surgery, Noshiro Kousei Medical Center, Noshiro, Akita, Japan

\* [prcmcn3@gmail.com](mailto:prcmcn3@gmail.com)

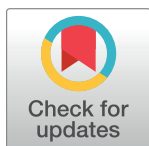

## Abstract

Optimal ligament balance is crucial for successful total knee arthroplasty (TKA), which is a standard procedure for managing end-stage knee osteoarthritis. However, the reported values of ligament balance vary due to different methodologies and population differences, which requires further studies. This study aimed to investigate the varus-valgus ligament balance in healthy knees of Japanese individuals and its relationship with lower limb alignment. The study analyzed 64 knees from 33 healthy young adults using stress radiographs to measure varus-valgus laxity. The mechanical hip-knee-ankle angle, medial proximal tibial angle, and lateral distal femoral angles were determined using digital long-leg radiographs. Varus and valgus laxities were compared, and the relationship between ligament balance and alignment parameters was analyzed. Mean varus laxity ( $3.6^\circ \pm 1.3^\circ$ ) was significantly greater than mean valgus laxity ( $2.9^\circ \pm 1.0^\circ$ ) ( $p < 0.0001$ ). No significant association was observed between ligament balance and alignment parameters. Healthy knees of Japanese individuals exhibited slightly greater varus laxity ( $0.7^\circ$ ) than valgus laxity, with no correlation observed between ligament balance and lower limb alignment. The finding underscores the importance of recognizing alignment diversity while noting that alignment does not influence ligament balance; this is particularly relevant in modern TKA techniques focusing on patient-specific joint and ligament reconstructions. The study's findings could help formulate strategies benefiting knee osteoarthritis management.

## OPEN ACCESS

**Citation:** Akagawa M, Saito H, Takahashi Y, Tsukamoto H, Abe K, Iwamoto Y, et al. (2024) Varus-valgus native knee laxity in extension displays an almost rectangular pattern and does not correlate with lower limb alignment. PLoS ONE 19(11): e0313402. <https://doi.org/10.1371/journal.pone.0313402>

**Editor:** Gennaro Pipino, San Raffaele University Milan, ITALY

**Received:** September 18, 2024

**Accepted:** October 22, 2024

**Published:** November 12, 2024

**Copyright:** © 2024 Akagawa et al. This is an open access article distributed under the terms of the [Creative Commons Attribution License](https://creativecommons.org/licenses/by/4.0/), which permits unrestricted use, distribution, and reproduction in any medium, provided the original author and source are credited.

**Data Availability Statement:** All relevant data are within the paper and its [Supporting Information](#) files.

**Funding:** The author(s) received no specific funding for this work.

**Competing interests:** The authors have declared that no competing interests exist.

## Introduction

Total knee arthroplasty (TKA) is a common procedure for managing end-stage knee osteoarthritis (OA). Ligament balance in TKA is recognized as a crucial factor influencing postoperative outcomes [1, 2]. Traditional mechanical alignment TKA aims to create a rectangular ligament balance in extension and flexion [3]. However, achieving equal rectangular gaps for extension and flexion is challenging. Recent study have suggested a certain tolerance for laxity

on the lateral side [4]; however, the acceptable extent of this laxity is unclear, and the boundary between laxity and instability remains undefined. Kinematic alignment TKA has recently focused on reconstructing the pre-arthritis joint without releasing the ligaments [5]. The caliper technique allows the reconstruction of patient-specific alignment and ligament balance [6]. Thus, the goals of ligament balance in TKA have evolved, particularly toward achieving a more physiological ligament balance.

Several studies have investigated ligament balance in healthy knees to understand physiological ligament balance. A recent meta-analysis of *in vitro* studies revealed that the joint asymmetry of varus-valgus laxity during extension was significant; however, the degree was only  $0.17^\circ$  [7]. In contrast, a Japanese *in vivo* study revealed a varus laxity  $2.5^\circ$  greater than valgus laxity [8]. Direct comparison of results from previous studies is difficult because of the heterogeneity in methodologies, including variations in stress radiographs, applied loads, measurement units, participant demographics (such as age), racial diversity, and the exact nature of the physiological ligament balance.

Regarding racial differences, a previous study revealed greater anterior cruciate ligament laxity in Japanese individuals than in Caucasians, along with distinctive bone morphology characteristics, such as femoral valgus and tibial varus [9]. Furthermore, Japanese lower limb alignment tends to be more varus than that in Western populations [10]. However, the impact of such distinctive bone morphology and racial differences on varus-valgus laxity remains unclear.

This study primarily aimed to investigate the varus-valgus ligament balance in the extension of healthy knees of Japanese individuals. The secondary aim of the study was to explore the relationship between lower limb alignment and ligament balance. We hypothesized that, in healthy knees of Japanese individuals, the varus laxity in extension would be significantly greater than valgus laxity and that an association exists between lower limb alignment and ligament balance.

## Materials and methods

### Participants

The healthy young adult cohort comprised in-hospital volunteers who participated in a prospective cross-sectional study conducted between March 10th and April 20th, 2023. This study enrolled 35 participants (70 knees). The following exclusion criteria were used to define healthy knees: participant age over 60 years; obvious osteoarthritic changes (Kellgren–Lawrence grade  $> 1$ ); history of knee surgery or trauma, including ligament injury and fracture; history of knee pain lasting for more than 1 week; present knee pain; rheumatoid arthritis; excessive knee joint laxity, especially hyperextension; contracture or restricted range of motion. After applying these criteria, 33 participants (19 men and 14 women) with 64 knees were included in the study (Fig 1). Written informed consent was obtained from all participants, and the ethics committee of Omagari Kousei Medical Center approved this study (approved #22–044).

### Radiological analysis

Varus-valgus laxity in extension was assessed using a Telos stress device in the anteroposterior view of the knee. The Telos device was applied at 15daN at the joint-line level [11], with the knee angle at  $0^\circ$  flexion. The X-rays were directed anteriorly at a  $10^\circ$  angle from above to ensure the tibial plateau was perpendicular to the film. Knee angle and rotation were controlled by a radiologic technologist to prevent malrotation, and only radiographs where the tibia overlapped the fibula by one-third to two-thirds were accepted. The angle between the

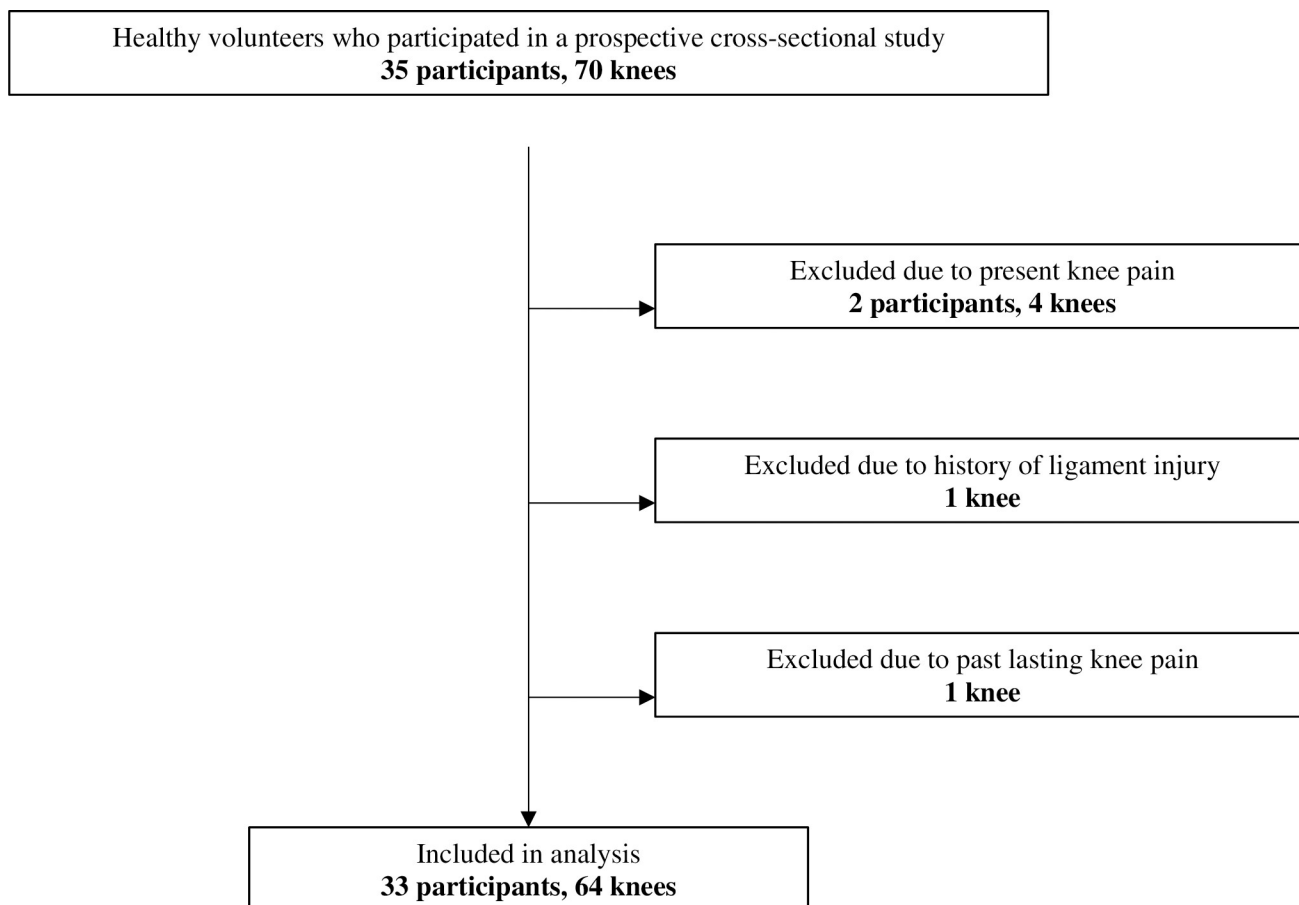

**Fig 1. Flow chart of inclusion and exclusion criteria.** The flowchart illustrates the sequential steps of inclusion and exclusion of participants in the study.

<https://doi.org/10.1371/journal.pone.0313402.g001>

tangent line on the femoral condyles and the tibial plateau was measured on varus, valgus, and neutral radiographs. In this calculation, the lateral opening angle was defined as positive, and the medial opening angle was defined as negative. Relative varus laxity is the absolute value of the angular difference between the varus and neutral radiographs, and relative valgus laxity is the absolute value of the angular difference between the valgus and neutral radiographs.

Digital long-leg radiographs were obtained as described by Paley et al. [12]. The mechanical hip-knee-ankle angle (mHKA) was defined as the angle between the mechanical axes of the femur and tibia. The mechanical medial proximal tibial angle (MPTA) was the medial angle between the mechanical axis of the tibia and the joint line of the proximal tibia. The mechanical lateral distal femoral angle (LDFA) was defined as the lateral angle between the mechanical axis and the joint line of the distal femur.

### Statistical analysis

Before the study, G\*Power analysis (Ver.3.1.9.6) showed that 64 ( $\alpha = 0.05$ ,  $1-\beta = 0.8$ , effect size = 0.5) and 55 knees ( $\alpha = 0.05$ ,  $1-\beta = 0.8$ , effect size = 0.15) were necessary to achieve statistical power for the primary and secondary aims, respectively. For the secondary aim, the null hypothesis was that there would be no significant association between lower limb alignment and ligament balance, whereas the alternative hypothesis was that a significant association does exist.

For the primary aim, the differences in relative varus and valgus were analyzed using paired t-tests. For the secondary aim, a single regression analysis was performed to investigate the relationship between the differences in relative varus-valgus laxity and age, sex, and alignment parameters. All statistical analyses were performed using EZR [13], and statistical significance was set at  $p < 0.05$ .

## Results

[Table 1](#) summarizes the participant characteristics and radiological parameters. The mHKA, MPTA, and LDFA values were  $-1.9^\circ \pm 2.5^\circ$ ,  $84.9^\circ \pm 1.9^\circ$ , and  $86.1^\circ \pm 1.9^\circ$ , respectively. The distribution of mHKA was diverse ([Fig 2](#)).

The mean varus and valgus laxities were  $3.6^\circ \pm 1.3^\circ$  and  $2.9^\circ \pm 1.0^\circ$ , respectively. Varus laxity was significantly greater than valgus laxity ( $p < 0.0001$ ) ([Fig 3](#)).

No significant association was observed between varus and valgus differences and age, sex, or alignment parameters ([Table 2](#)).

## Discussion

The most important finding of this study was that varus laxity was significant but only  $0.7^\circ$  greater than valgus laxity in healthy Japanese population. Additionally, contrary to our hypothesis, laxity did not correlate with alignment parameters. Despite diverse lower limb alignments, the study found that ligament balance asymmetry remained relatively consistent, suggesting that ligament balance was reliable across different alignments, which may enhance clinical assessments and treatment strategies.

We have summarized previous reports on native knee laxity [8, 14–20] in [Table 3](#). The difference in varus-valgus laxity varies between reports, ranging from  $0.3$ – $0.5^\circ$  to  $>2^\circ$ . Several factors may have contributed to this discrepancy.

First, the measurement of joint angle changes during stress radiographs can yield different results depending on whether the angles are calculated as absolute or relative to the neutral position [21]. Absolute measurements reflect the joint surface's inclination angle, whereas relative measurements indicate ligament extensibility. Due to individual variations in joint surface inclination at the neutral position, substantial differences between absolute and relative values can be observed. Therefore, when evaluating "ligament balance," relative values that reflect ligament extensibility may provide more representative information about the ligament's condition, minimizing the influence of joint structure.

**Table 1. Participants' characteristics and radiological parameters.**

|                              |                |
|------------------------------|----------------|
| Sex (M: F)                   | 19:14          |
| Age (years)                  | $33.7 \pm 9.8$ |
| mHKA ( $^\circ$ )            | $-1.9 \pm 2.5$ |
| MPTA ( $^\circ$ )            | $84.9 \pm 1.9$ |
| LDFA ( $^\circ$ )            | $86.1 \pm 1.9$ |
| Absolute varus( $^\circ$ )   | $4.2 \pm 1.6$  |
| Absolute valgus ( $^\circ$ ) | $-2.3 \pm 1.0$ |
| Neutral ( $^\circ$ )         | $0.6 \pm 0.9$  |
| Relative varus( $^\circ$ )   | $3.6 \pm 1.3$  |
| Relative valgus ( $^\circ$ ) | $2.9 \pm 1.0$  |

mHKA: mechanical hip–knee–ankle angle; MPTA: medial proximal tibial angle; LDFA: lateral distal femoral angle; M, male; F, female

<https://doi.org/10.1371/journal.pone.0313402.t001>

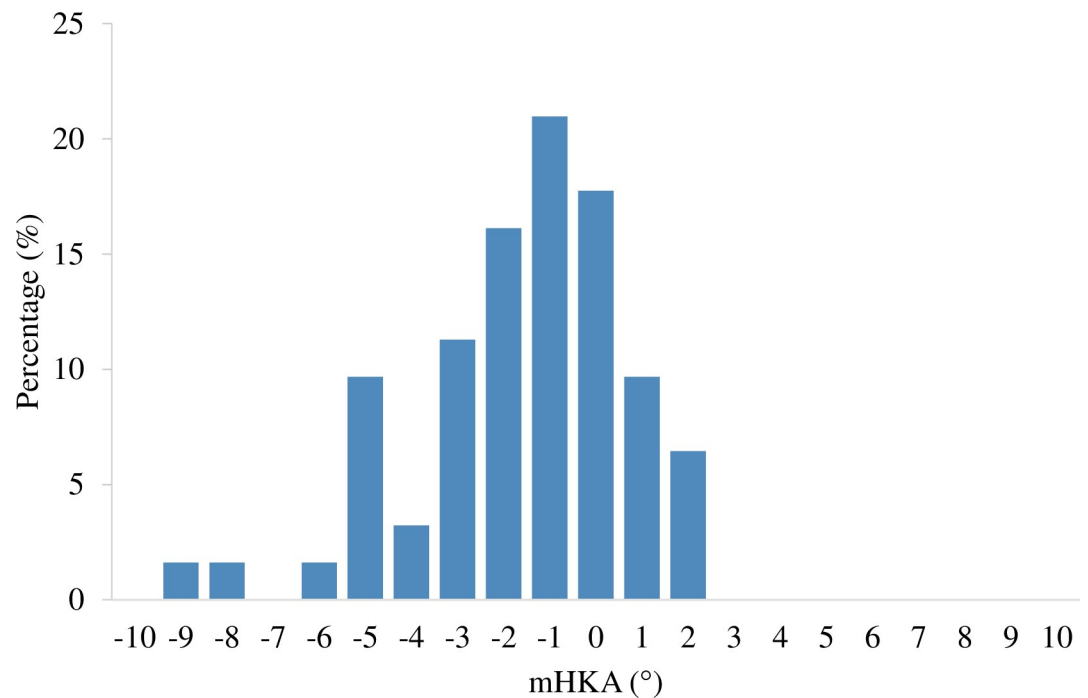

**Fig 2. Distribution of lower limb alignment.** The distribution of lower limb alignment in the native knees of Japanese individuals showed substantial diversity, with a maximum varus angle exceeding  $-9^\circ$ .

<https://doi.org/10.1371/journal.pone.0313402.g002>

Second, the knee joint flexion angle during a stress radiograph can affect the results. The reason for slightly flexing the knee during a stress radiograph was to place the tibial plateau perpendicular to the film in the report of a healthy knee [8] or to minimize the influence of flexion contracture in the analysis of postoperative knee [21–24]. However, previous reports revealed that the values differ at  $0^\circ$  and  $15^\circ$  flexion [14, 15], and the greatest change in laxity

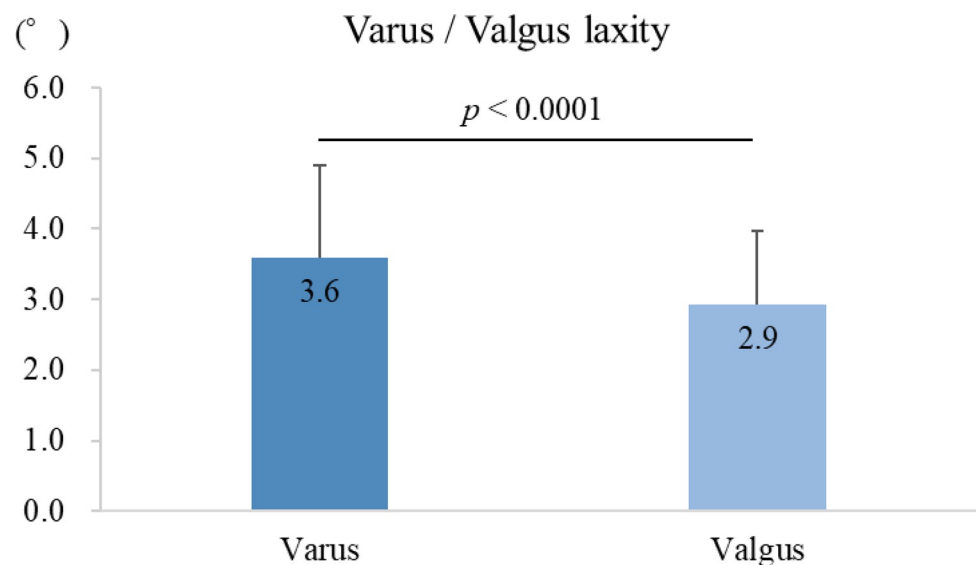

**Fig 3. Varus and valgus laxity of the native knee.** Varus laxity was significantly greater than valgus laxity by  $0.7^\circ$ .

<https://doi.org/10.1371/journal.pone.0313402.g003>

**Table 2. Association between patient characteristics, alignment parameters, and the difference in varus-valgus laxity.**

|             | $\beta$ | 95% CI          | <i>p</i> -value |
|-------------|---------|-----------------|-----------------|
| <b>Age</b>  | 0.03    | -0.0004 to 0.06 | 0.05            |
| <b>Sex</b>  | -0.48   | -1.12 to 0.17   | 0.14            |
| <b>mHKA</b> | 0.03    | -0.09 to 0.16   | 0.58            |
| <b>LDFA</b> | -0.01   | -0.18 to 0.16   | 0.89            |
| <b>MPTA</b> | 0.02    | -0.15 to 0.19   | 0.82            |

Difference in varus-valgus laxity was calculated by subtracting the valgus angle from the varus angle.

mHKA: mechanical hip–knee–ankle angle; MPTA: medial proximal tibial angle; LDFA: lateral distal femoral angle;

CI: confidence interval

<https://doi.org/10.1371/journal.pone.0313402.t002>

occurred between 0–10° flexion [25]. Coupled motion during knee flexion also plays a role, as rotational coupled motion occurs with varus-valgus stress at flexion angles >15°, whereas it is minimal at full extension [15]. Therefore, even slight flexion affects the results of varus-valgus stress radiographs. Evaluating ligament balance at full extension remains relevant and important for healthy knees, as it minimizes these variations and ensures a stable and reproducible assessment of ligament balance.

Considering these influences, this study indicates that the difference in varus-valgus laxity is generally small, which is clinically close to a rectangle when measured at full extension using relative calculation. Variations observed in previous studies appear to be largely due to

**Table 3. Summary of past reports regarding native knee laxity.**

| Author                  | <i>In vivo or in vitro</i> | Number of knees | Age (years) | Sex (male: female) | Method                 | Applied force | Knee Extension angle | Measurement (absolute or relative) | Varus      | Valgus     |
|-------------------------|----------------------------|-----------------|-------------|--------------------|------------------------|---------------|----------------------|------------------------------------|------------|------------|
| Okazaki et al. [8]      | <i>In vivo</i>             | 50              | 25.9 ±7.5   | 34:16              | Stress Radiograph      | 15 kg         | 10°                  | Absolute                           | 4.9° ±2.0° | 2.4° ±1.6° |
| Heesterbeek et al. [16] | <i>In vivo</i>             | 30              | 62 ±6.4     | 15:15              | Stress Radiograph      | 15 Nm         | 0°                   | Relative                           | 2.8° ±1.3° | 2.3° ±0.8° |
| Deep et al. [14]        | <i>In vivo</i>             | 267             | 26.2        | 155:112            | Navigation             | 10 Nm         | 0°                   | Relative                           | Men        |            |
|                         |                            |                 |             |                    |                        |               |                      |                                    | 3.0° ±1.8° | 4.2° ±2.0° |
|                         |                            |                 |             |                    |                        |               |                      |                                    | Women      |            |
|                         |                            |                 |             |                    |                        |               |                      |                                    | 3.3°±2.2°  | 5.0° ±2.4° |
| Yoo et al. [20]         | <i>In vivo</i>             | 200             | 39 ±11.9    | 100:100            | Custom made device     | Manual stress | 20°                  | Absolute                           | 7.0° ±1.2° | 4.1° ±0.9° |
| Shultz et al. [17]      | <i>In vivo</i>             | 20              |             | 10:10              | Custom made device     | 10 Nm         | 20°                  | Absolute                           | 6.9°       | 5.2° ±1.0° |
| Te Molder et al. [18]   | <i>In vivo</i>             | 40              | 62.7 ±5.8   | 13:27              | stress Radiograph      | 15 Nm         | 0°                   | Relative                           | Men        |            |
|                         |                            |                 |             |                    |                        |               |                      |                                    | 1.5° ±0.9° | 2.0° ±0.6° |
|                         |                            |                 |             |                    |                        |               |                      |                                    | Women      |            |
|                         |                            |                 |             |                    |                        |               |                      |                                    | 2.4°±1.3°  | 2.1° ±1.3° |
| Gladnick et al. [15]    | <i>In vitro</i>            | 20              | 45 ±14      | 14:6               | Robotic testing device | 4 Nm          | 0°                   | Relative                           | 2.0°±1.1°  | 1.5° ±0.5° |
| VanDamme et al. [19]    | <i>In vitro</i>            | 12              | 68          | -                  | Navigation             | 9.8 Nm        | 0°                   | Absolute                           | 3.1±0.8 mm | 2.6±1.0 mm |

<https://doi.org/10.1371/journal.pone.0313402.t003>

differences in measurement methods rather than inherent factors. Discrepancies between studies can be minimized by carefully aligning measurement conditions, such as ensuring consistent knee flexion angles and using relative calculations. This underscores the importance of methodological consistency in achieving more reliable and comparable results across studies.

The lower limb alignment of the Japanese population in this study averaged mHKA as -1.9, which was more varus, compared with the lower limb alignment in Western populations (mHKA = -1.0–1.3) as per previous reports [26–28]. Furthermore, the distribution of lower limb alignment in this study was diverse, with the maximum varus angle exceeding  $-9^{\circ}$ . These observations have recently been increasingly recognized as part of the concept of constitutional varus [26]. However, this study did not demonstrate a correlation between ligament balance and lower limb alignment despite this diversity.

A previous study reported that female individuals generally exhibit greater laxity than male individuals [29]. However, when evaluating varus-valgus difference as “ligament balance,” no significant sex differences or associations with alignment were observed, as indicated in this study. Thus, ligament balance shows consistency regardless of sex or alignment variations. To our knowledge, this study is the first to investigate the correlation between ligament balance and alignment. In recent TKA, which aims to reconstruct the pre-arthritis joint and ligament balance, understanding the relationship between alignment and ligament balance, as demonstrated in this study, is important.

This study has some limitations. First, although the sample size in this study was larger than that in previous reports and we conducted a sample size calculation before the study, it may still lack sufficient representation of the diverse spectrum of skeletal morphologies. Second, previous studies have demonstrated a correlation between HKA and extension gap asymmetry in OA knees [30–34], and another study revealed that ligament balance might change with OA progression [35]. In contrast, our study focused on healthy knees and suggested that ligament balance asymmetry was not inherent in healthy knees but may develop with OA progression. Consequently, the direct applicability of our results to TKA cases remains uncertain. Future research should explore how ligament balance changes during OA progression to evaluate the applicability of our findings to TKA cases. Finally, we only evaluated ligament balance in extension due to the difficulty in stress imaging and the substantial impact of coupled motion during flexion. Stability in mid to full flexion is critical in TKA; however, assessing flexion stability using a highly reproducible *in vivo* method that minimizes the influence of coupled motion is important.

In conclusion, this study demonstrates that healthy knees of Japanese individuals exhibit significantly greater varus laxity than valgus laxity ( $0.7^{\circ}$ ). No correlation was observed between ligament balance and lower limb alignment. These findings underscore the importance of recognizing alignment diversity while noting that ligament balance is not influenced by alignment. This finding is particularly relevant in modern TKA techniques that focus on patient-specific joint and ligament reconstructions.

## Supporting information

**S1 Data.**  
(XLSX)

## Acknowledgments

The authors thank Fuka Oikawa for her valuable assistance in editing the manuscript and Editage ([www.editage.jp](http://www.editage.jp)) for English language editing.



## Author Contributions

**Conceptualization:** Manabu Akagawa, Hidetomo Saito, Hiroaki Tsukamoto.

**Data curation:** Manabu Akagawa, Yosuke Iwamoto, Takayuki Yoshikawa, Toshiki Abe.

**Formal analysis:** Manabu Akagawa, Kazunobu Abe, Yosuke Iwamoto.

**Investigation:** Manabu Akagawa, Kazunobu Abe, Yosuke Iwamoto.

**Methodology:** Manabu Akagawa, Hidetomo Saito, Yasuhiro Takahashi.

**Supervision:** Naohisa Miyakoshi.

**Writing – original draft:** Manabu Akagawa.

**Writing – review & editing:** Hiroaki Kijima, Yuji Kasukawa, Koji Nozaka, Naohisa Miyakoshi.

## References

1. Tsukiyama H, Kuriyama S, Kobayashi M, Nakamura S, Furu M, Ito H, et al. Medial rather than lateral knee instability correlates with inferior patient satisfaction and knee function after total knee arthroplasty. *Knee*. 2017; 24:1478–1484. <https://doi.org/10.1016/j.knee.2017.09.004> PMID: 28970125
2. Watanabe T, Koga H, Katagiri H, Otabe K, Nakagawa Y, Muneta T, et al. Coronal and sagittal laxity affects clinical outcomes in posterior-stabilized total knee arthroplasty: assessment of well-functioning knees. *Knee Surg Sports Traumatol Arthrosc*. 2020; 28:1400–1409. <https://doi.org/10.1007/s00167-019-05500-8> PMID: 30980120
3. Insall JN, Binazzi R, Soudry M, Mestriner LA. Total knee arthroplasty. *Clin Orthop Relat Res*. 1985; 192:13–22
4. Tanaka Y, Nakamura S, Kuriyama S, Nishitani K, Ito H, Lyman S, et al. Intraoperative physiological lateral laxity in extension and flexion for varus knees did not affect short-term clinical outcomes and patient satisfaction. *Knee Surg Sports Traumatol Arthrosc*. 2020; 28:3888–3898. <https://doi.org/10.1007/s00167-020-05862-4> PMID: 32030501
5. Howell SM, Kuznik K, Hull ML, Siston RA. Results of an initial experience with custom-fit positioning total knee arthroplasty in a series of 48 patients. *Orthopedics*. 2008; 31:857–863. <https://doi.org/10.3928/01477447-20080901-15> PMID: 18814593
6. Howell SM. Calipered kinematically aligned total knee arthroplasty: an accurate technique that improves patient outcomes and implant survival. *Orthopedics*. 2019; 42:126–135. <https://doi.org/10.3928/01477447-20190424-02> PMID: 31099877
7. Ferle M, Guo R, Hurschler C. The laxity of the native knee: a meta-analysis of in vitro studies. *J Bone Joint Surg Am*. 2019; 101:1119–1131. <https://doi.org/10.2106/JBJS.18.00754> PMID: 31220029
8. Okazaki K, Miura H, Matsuda S, Takeuchi N, Mawatari T, Hashizume M, et al. Asymmetry of mediolateral laxity of the normal knee. *J Orthop Sci*. 2006; 11:264–266. <https://doi.org/10.1007/s00776-006-1009-x> PMID: 16721527
9. Hovinga KR, Lerner AL. Anatomic variations between Japanese and Caucasian populations in the healthy young adult knee joint. *J Orthop Res*. 2009; 27:1191–1196. <https://doi.org/10.1002/jor.20858> PMID: 19242980
10. Wanezaki Y, Suzuki A, Takakubo Y, Nakajima T, Toyono S, Toyoshima S, et al. Lower limb alignment in healthy Japanese adults. *J Orthop Sci*. 2023; 28:200–203. <https://doi.org/10.1016/j.jos.2021.10.016> PMID: 34815138
11. Koppens D, Sørensen OG, Munk S, Rytter S, Larsen SKA, Stilling M, et al. The lateral joint space width can be measured reliably with Telos valgus stress radiography in medial knee osteoarthritis. *Skeletal Radiol*. 2019; 48:1069–1077. <https://doi.org/10.1007/s00256-018-3111-5> PMID: 30456552
12. Paley D. Radiographic assessment of lower limb deformities. In: Paley D, editor. *Principles of Deformity Correction*. Springer: Berlin, Heidelberg; 2002. pp 31–60. [https://doi.org/10.1007/978-3-642-59373-4\\_3](https://doi.org/10.1007/978-3-642-59373-4_3)
13. Kanda Y. Investigation of the freely available easy-to-use software “EZ” for medical statistics. *Bone Marrow Transplant*. 2013; 48:452–458. <https://doi.org/10.1038/bmt.2012.244> PMID: 23208313
14. Deep K. Collateral ligament laxity in knees: what is normal? *Clin Orthop Relat Res*. 2014; 472:3426–3431. <https://doi.org/10.1007/s11999-014-3865-6> PMID: 25115587



15. Gladnick BP, Boorman-Padgett J, Stone K, Kent RN, Cross MB, Mayman DJ, et al. Primary and coupled motions of the native knee in response to applied varus and valgus load. *Knee*. 2016; 23:387–392. <https://doi.org/10.1016/j.knee.2016.01.006> PMID: 26875048
16. Heesterbeek PJC, Verdonchot N, Wymenga AB. In vivo knee laxity in flexion and extension: a radiographic study in 30 older healthy subjects. *Knee*. 2008; 15:45–49. <https://doi.org/10.1016/j.knee.2007.09.007> PMID: 18006318
17. Shultz SJ, Shimokochi Y, Nguyen A-D, Schmitz RJ, Beynnon BD, Perrin DH. Measurement of varus-valgus and internal-external rotational knee laxities in vivo—Part II: relationship with anterior-posterior and general joint laxity in males and females. *J Orthop Res*. 2007; 25:989–996. <https://doi.org/10.1002/jor.20398> PMID: 17469179
18. Te Molder MEM, Wymenga AB, Heesterbeek PJC. Mid-flexion laxity in the asymptomatic native knee is predominantly present on the lateral side. *Knee Surg Sports TraumatolArthrosc*. 2019; 27:3614–3625. <https://doi.org/10.1007/s00167-019-05474-7> PMID: 30903221
19. Van Damme G, Defoort K, Ducoulombier Y, Van Glabbeek F, Bellemans J, Victor J. What should the surgeon aim for when performing computer-assisted total knee arthroplasty? *J Bone Joint Surg Am*. 2005; 87:52–58. <https://doi.org/10.2106/JBJS.E.00447> PMID: 16326723
20. Yoo JC, Ahn JH, Sung K-S, Wang JH, Lee SH, Bae SW, et al. Measurement and comparison of the difference in normal medial and lateral knee joint opening. *Knee Surg Sports TraumatolArthrosc*. 2006; 14:1238–1244. <https://doi.org/10.1007/s00167-006-0095-9> PMID: 16758233
21. Ushio T, Mizu-Uchi H, Okazaki K, Miyama K, Akasaki Y, Ma Y, et al. Medial soft tissue contracture does not always exist in varus osteoarthritis knees in total knee arthroplasty. *Knee Surg Sports TraumatolArthrosc*. 2019; 27:1642–1650. <https://doi.org/10.1007/s00167-018-5276-9> PMID: 30402662
22. Gustke KA, Golladay GJ, Roche MW, Elson LC, Anderson CR. A targeted approach to ligament balancing using kinetic sensors. *J Arthroplasty*. 2017; 32:2127–2132. <https://doi.org/10.1016/j.arth.2017.02.021> PMID: 28285037
23. Moore RE, Conditt MA, Roche MW, Verstraete MA. How to quantitatively balance a total knee? A surgical algorithm to assure balance and control alignment. *Sensors (Basel)*. 2021; 21:700. <https://doi.org/10.3390/s21030700> PMID: 33498576
24. Wakelin EA, Ponder CE, Randall AL, Koenig JA, Plaskos C, DeClaire JH, et al. Intra-operative laxity and balance impact 2-year pain outcomes in TKA: a prospective cohort study. *Knee Surg Sports TraumatolArthrosc*. 2023; 31:5535–5545. <https://doi.org/10.1007/s00167-023-07601-x> PMID: 37837574
25. Markolf KL, Mensch JS, Amstutz HC. Stiffness and laxity of the knee—the contributions of the supporting structures. A quantitative in vitro study. *J Bone Joint Surg Am*. 1976; 58(5):583–94. PMID: 946969
26. Bellemans J, Colyn W, Vandenuecker H, Victor J. The Chitranjan Ranawat award: is neutral mechanical alignment normal for all patients? The concept of constitutional varus. *Clin Orthop Relat Res*. 2012; 470:45–53. <https://doi.org/10.1007/s11999-011-1936-5> PMID: 21656315
27. Cooke D, Scudamore A, Li J, Wyss U, Bryant T, Costigan P. Axial lower-limb alignment: comparison of knee geometry in normal volunteers and osteoarthritis patients. *Osteoarthritis Cartilage*. 1997; 5:39–47. [https://doi.org/10.1016/S1063-4584\(97\)80030-1](https://doi.org/10.1016/S1063-4584(97)80030-1) PMID: 9010877
28. MacDessi SJ, Griffiths-Jones W, Harris IA, Bellemans J, Chen DB. Coronal Plane Alignment of the Knee (CPAK) classification. *Bone Joint J*. 2021; 103-B:329–337. <https://doi.org/10.1302/0301-620X.103B2.BJJ-2020-1050.R1> PMID: 33517740
29. Boguszewski DV, Cheung EC, Joshi NB, Markolf KL, McAllister DR. Male-female differences in knee laxity and stiffness: a cadaveric study. *Am J Sports Med*. 2015; 43:2982–2987. <https://doi.org/10.1177/0363546515608478> PMID: 26464493
30. Edelstein AI, Wakelin EA, Plaskos C, Suleiman LI. Laxity, balance, and alignment of a simulated kinematic alignment total knee arthroplasty. *Arthroplast Today*. 2023; 23:101204. <https://doi.org/10.1016/j.artd.2023.101204> PMID: 37745959
31. Graichen H, Lekkresuwann K, Eller K, Grau T, Hirschmann MT, Scior W. A single type of varus knee does not exist: morphotyping and gap analysis in varus OA. *Knee Surg Sports TraumatolArthrosc*. 2022; 30:2600–2608. <https://doi.org/10.1007/s00167-021-06688-4> PMID: 34414473
32. Grosso MJ, Wakelin EA, Plaskos C, Lee G-C. Alignment is only part of the equation: High variability in soft tissue distractibility in the varus knee undergoing primary TKA. *Knee Surgery, Sports Traumatology, Arthroscopy*. 2024; 32:1516–1524. <https://doi.org/10.1002/ksa.12115> PMID: 38488243
33. Kim R, Wakelin EA, Plaskos C, Gupta S, Putman S. Variation in knee balance as a function of hip-knee-ankle angle and joint line obliquity in robotic assisted total knee arthroplasty. *Int Orthop*. 2023; 47:479–484. <https://doi.org/10.1007/s00264-022-05636-2> PMID: 36416899

34. Matziolis G, Matziolis D, Perka C. Pre-operative frontal plane malalignment predicts the extension gap asymmetry in knee osteoarthritis. *Int Orthop*. 2012; 36:79–82. <https://doi.org/10.1007/s00264-011-1294-7> PMID: [21674289](#)
35. Sharma L, Lou C, Felson DT, Dunlop DD, Kirwan-Mellis G, Hayes KW, et al. Laxity in healthy and osteoarthritic knees. *Arthritis Rheum*. 1999; 42:861–870. [https://doi.org/10.1002/1529-0131\(199905\)42:5<861::AID-ANR4>3.0.CO;2-N](https://doi.org/10.1002/1529-0131(199905)42:5<861::AID-ANR4>3.0.CO;2-N) PMID: [10323441](#)
